# Supplementary material
Source: Springer Nature journal article supplement (https://www.springermedizin.de/resource/supplementary/12936_2009_944_MOESM2_ESM.pdf/9548590)

Axillary temperature readings (°C)

38.5  
38  
37.5  
37  
36.5  
36  
35.5  
35

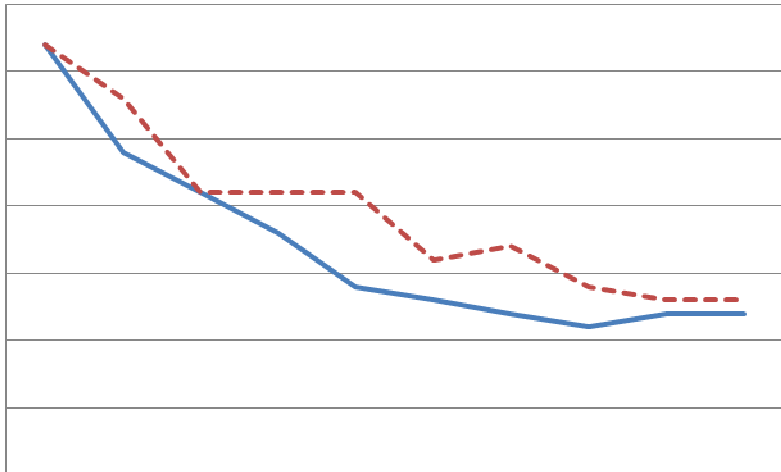

— ANQ

- - - CQ+SP

|       | 0    | 8    | 16   | 24   | 32   | 40   | 48   | 60   | 72   | D-7  |
|-------|------|------|------|------|------|------|------|------|------|------|
| ANQ   | 38.2 | 37.4 | 37.1 | 36.8 | 36.4 | 36.3 | 36.2 | 36.1 | 36.2 | 36.2 |
| CQ+SP | 38.2 | 37.8 | 37.1 | 37.1 | 37.1 | 36.6 | 36.7 | 36.4 | 36.3 | 36.3 |

Supplement: MOESM2 [file 9548590]
